# Supplementary material
Source: publisher site journal article supplement (https://www.spandidos-publications.com/6024/downloadSupplementary)

Figure S1. Forest plot showing the geographical regions subgroup analysis results for the association between metabolic dysfunction-associated fatty liver disease and hepatocellular carcinoma. DL, DerSimonian and Laird approach.

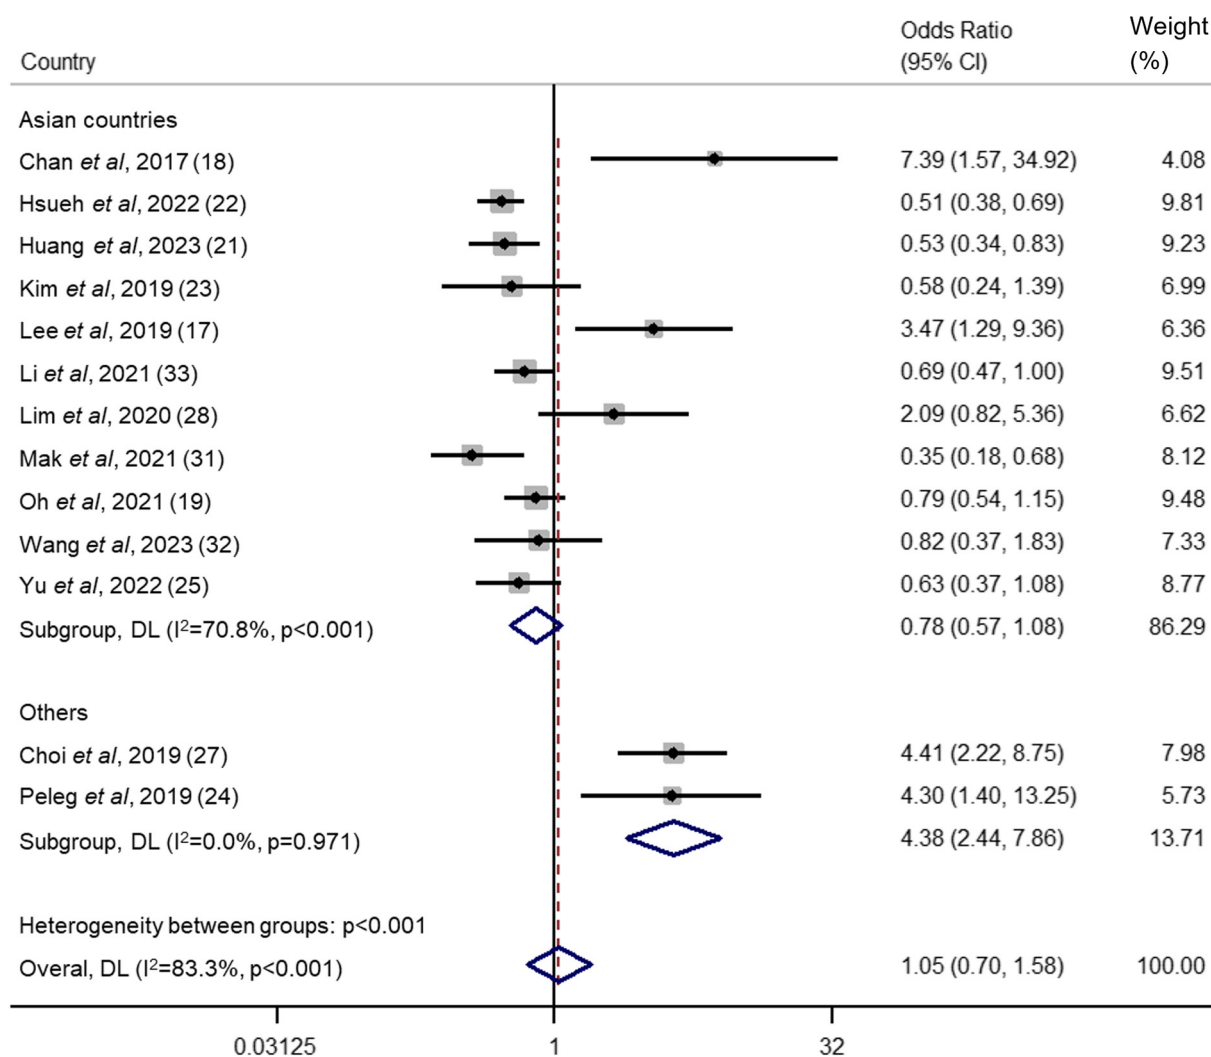

NOTE: Weights and between-subgroup heterogeneity test are from random-effects model

Figure S2. Forest plot showing the study design subgroup analysis results for the association between metabolic dysfunction-associated fatty liver disease and hepatocellular carcinoma. DL, DerSimonian and Laird approach.

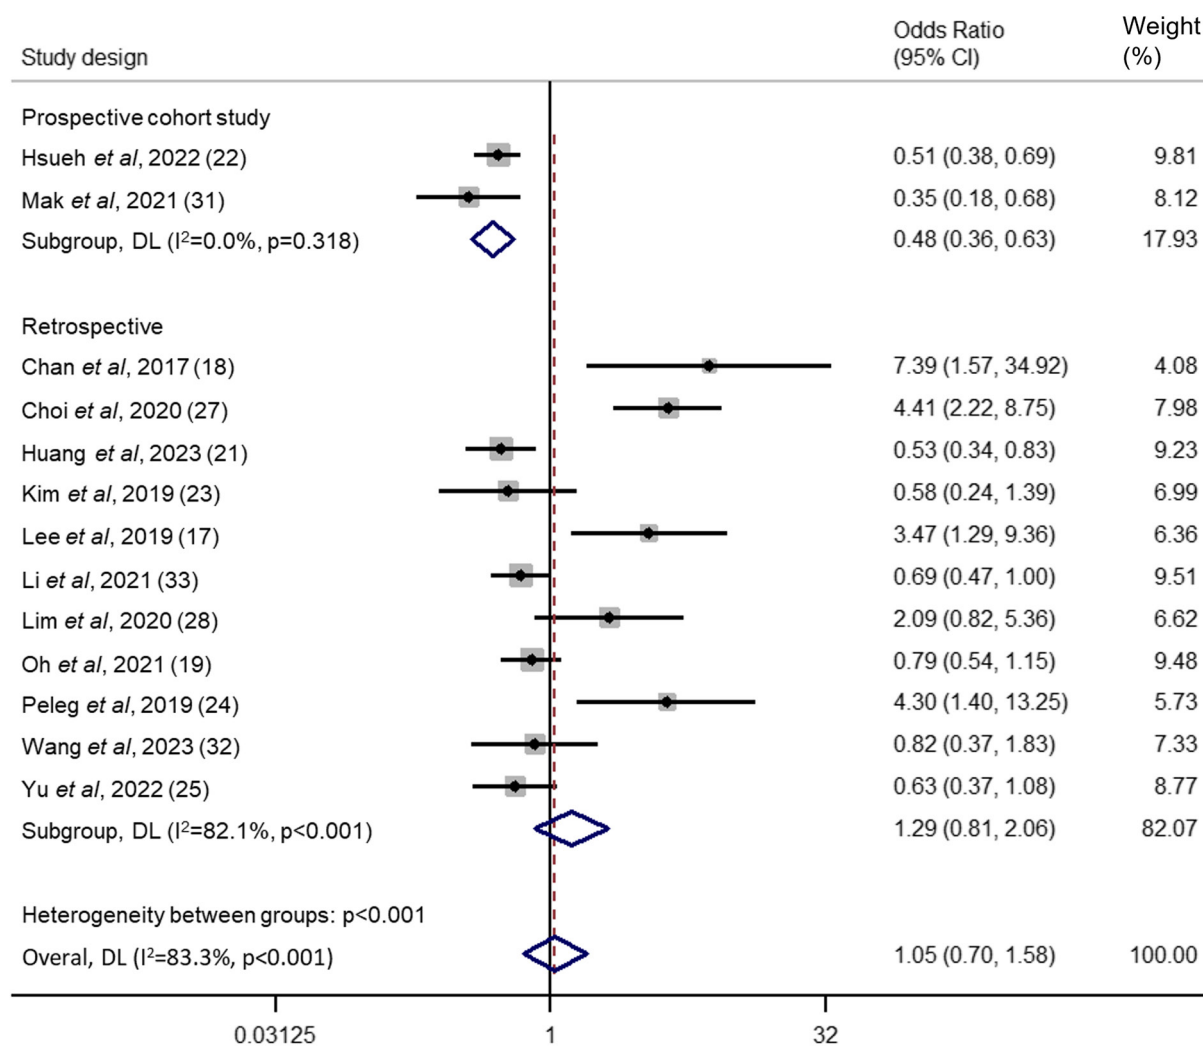

NOTE: Weights and between-subgroup heterogeneity test are from random-effects model

Figure S3. Forest plot showing the follow-up length subgroup analysis results for the association between metabolic dysfunction-associated fatty liver disease and hepatocellular carcinoma. DL, DerSimonian and Laird approach.

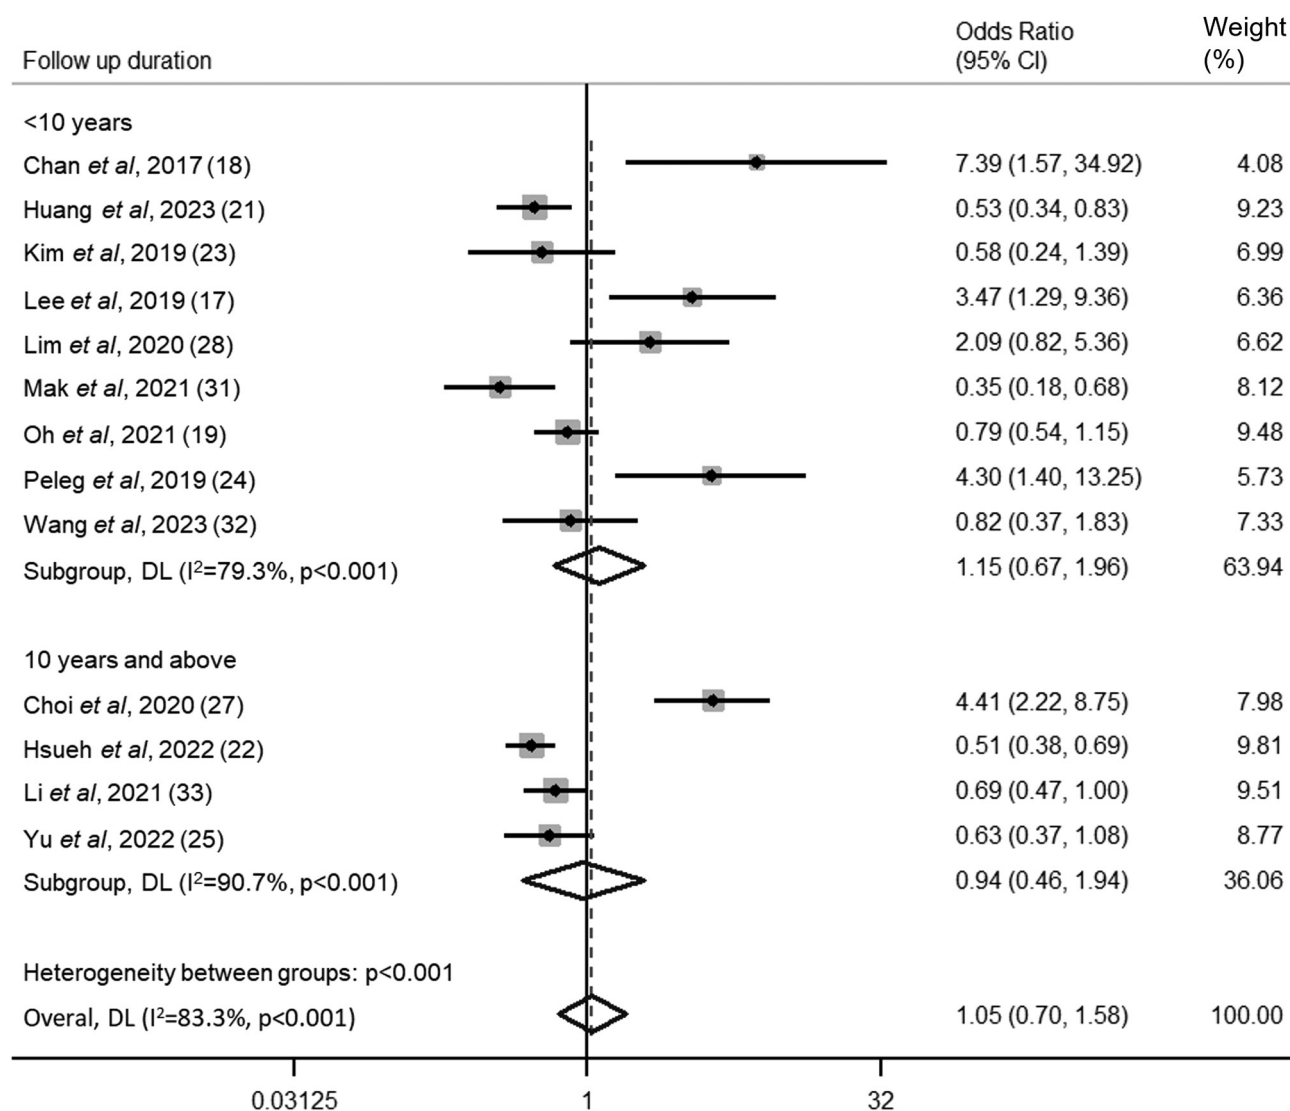

NOTE: Weights and between-subgroup heterogeneity test are from random-effects model

Figure S4. Sensitivity analysis.

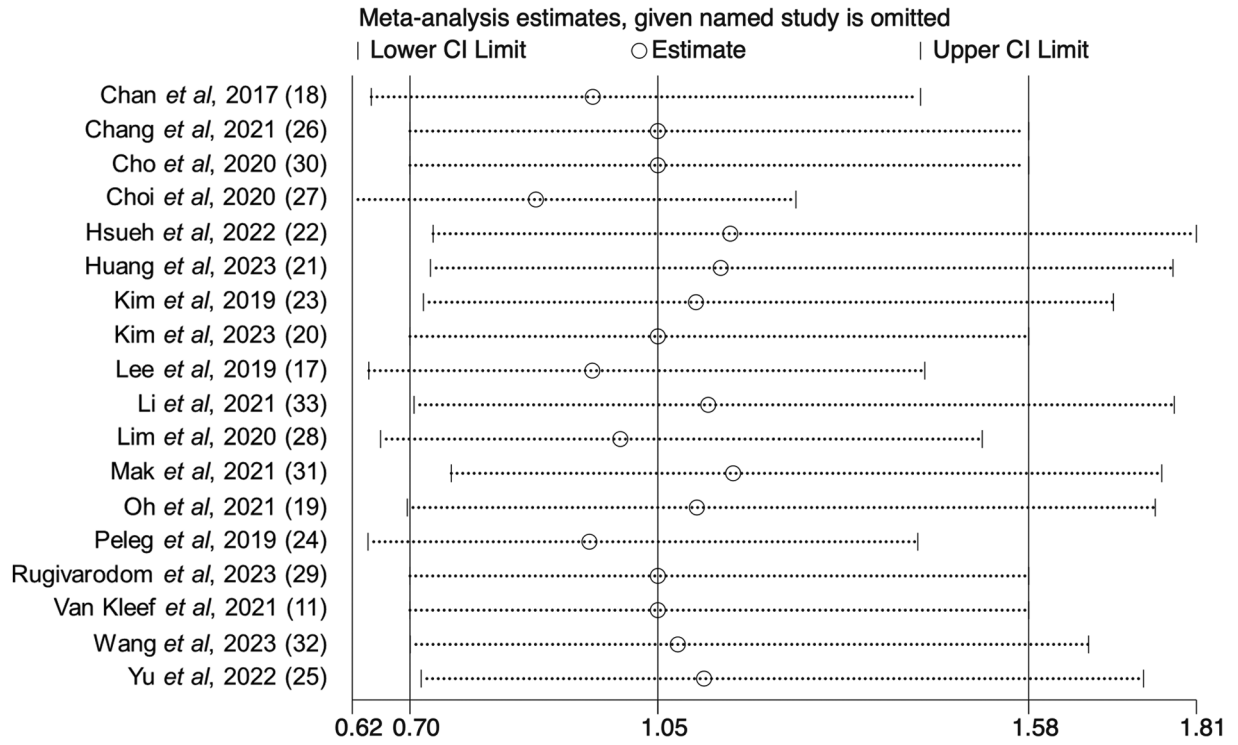

Supplement: Supplementary file 1 [file downloadSupplementary]
